# Supplementary material for: Structure and specificity of a permissive bacterial C-prenyltransferase
Source: Springer Nature journal article supplement (doi:10.1038/nchembio.2285), 2017-02-06
Supplement: 41589_2017_BFnchembio2285_MOESM82_ESM.mol [file 41589_2017_BFnchembio2285_MOESM82_ESM.mol]

nchembio.2285-comp38.mol
  ChemDraw01041716032D

 30 30  0  0  0  0  0  0  0  0999 V2000
    2.4984   -0.8167    0.0000 C   0  0  0  0  0  0  0  0  0  0  0  0
    3.2129   -0.4042    0.0000 O   0  0  0  0  0  0  0  0  0  0  0  0
    1.7839   -0.4042    0.0000 C   0  0  0  0  0  0  0  0  0  0  0  0
    1.0694   -0.8167    0.0000 C   0  0  0  0  0  0  0  0  0  0  0  0
    0.3550   -0.4042    0.0000 C   0  0  0  0  0  0  0  0  0  0  0  0
   -0.3595   -0.8167    0.0000 C   0  0  0  0  0  0  0  0  0  0  0  0
   -1.0740   -0.4042    0.0000 C   0  0  0  0  0  0  0  0  0  0  0  0
   -1.7884   -0.8167    0.0000 C   0  0  0  0  0  0  0  0  0  0  0  0
   -2.5029   -0.4042    0.0000 C   0  0  0  0  0  0  0  0  0  0  0  0
   -3.2174   -0.8167    0.0000 O   0  0  0  0  0  0  0  0  0  0  0  0
   -3.9319   -0.4042    0.0000 C   0  0  0  0  0  0  0  0  0  0  0  0
    1.0694   -1.6417    0.0000 C   0  0  0  0  0  0  0  0  0  0  0  0
   -1.7884   -1.6417    0.0000 C   0  0  0  0  0  0  0  0  0  0  0  0
   -3.9319    0.4208    0.0000 C   0  0  0  0  0  0  0  0  0  0  0  0
   -4.6463    0.8333    0.0000 C   0  0  0  0  0  0  0  0  0  0  0  0
   -5.3608    0.4208    0.0000 C   0  0  0  0  0  0  0  0  0  0  0  0
   -5.3608   -0.4042    0.0000 C   0  0  0  0  0  0  0  0  0  0  0  0
   -4.6463   -0.8167    0.0000 C   0  0  0  0  0  0  0  0  0  0  0  0
   -3.2174    0.8333    0.0000 F   0  0  0  0  0  0  0  0  0  0  0  0
   -4.6463    1.6583    0.0000 F   0  0  0  0  0  0  0  0  0  0  0  0
   -6.0753   -0.8167    0.0000 F   0  0  0  0  0  0  0  0  0  0  0  0
   -4.6463   -1.6417    0.0000 F   0  0  0  0  0  0  0  0  0  0  0  0
    3.9292   -0.8238    0.0000 P   0  0  0  0  0  0  0  0  0  0  0  0
    4.6464   -0.4161    0.0000 O   0  0  0  0  0  0  0  0  0  0  0  0
    5.3581   -0.8333    0.0000 P   0  0  0  0  0  0  0  0  0  0  0  0
    3.9237   -1.6488    0.0000 O   0  0  0  0  0  0  0  0  0  0  0  0
    6.0753   -0.4255    0.0000 O   0  5  0  0  0  0  0  0  0  0  0  0
    5.3526   -1.6583    0.0000 O   0  0  0  0  0  0  0  0  0  0  0  0
    3.9292    0.0012    0.0000 O   0  5  0  0  0  0  0  0  0  0  0  0
    5.3581   -0.0083    0.0000 O   0  5  0  0  0  0  0  0  0  0  0  0
  1  2  1  0      
  1  3  1  0      
  3  4  2  0      
  4  5  1  0      
  5  6  1  0      
  6  7  1  0      
  7  8  2  0      
  8  9  1  0      
  9 10  1  0      
 10 11  1  0      
  4 12  1  0      
  8 13  1  0      
 11 14  2  0      
 14 15  1  0      
 15 16  2  0      
 16 17  1  0      
 17 18  2  0      
 18 11  1  0      
 14 19  1  0      
 15 20  1  0      
 17 21  1  0      
 18 22  1  0      
 23 24  1  0      
 24 25  1  0      
 23 26  2  0      
 25 27  1  0      
 25 28  2  0      
 23 29  1  0      
 25 30  1  0      
  2 23  1  0      
M  CHG  3  27  -1  29  -1  30  -1
M  END
