# Supplementary material for: Structure and specificity of a permissive bacterial C-prenyltransferase
Source: Springer Nature journal article supplement (doi:10.1038/nchembio.2285), 2017-02-06
Supplement: 41589_2017_BFnchembio2285_MOESM100_ESM.mol [file 41589_2017_BFnchembio2285_MOESM100_ESM.mol]

nchembio.2285-comp47.mol
  ChemDraw01041716032D

 27 27  0  0  0  0  0  0  0  0999 V2000
    2.1426   -0.4025    0.0000 C   0  0  0  0  0  0  0  0  0  0  0  0
    2.8571    0.0100    0.0000 O   0  0  0  0  0  0  0  0  0  0  0  0
    1.4282    0.0100    0.0000 C   0  0  0  0  0  0  0  0  0  0  0  0
    0.7137   -0.4025    0.0000 C   0  0  0  0  0  0  0  0  0  0  0  0
   -0.0008    0.0100    0.0000 C   0  0  0  0  0  0  0  0  0  0  0  0
   -0.7152   -0.4025    0.0000 C   0  0  0  0  0  0  0  0  0  0  0  0
   -1.4297    0.0100    0.0000 C   0  0  0  0  0  0  0  0  0  0  0  0
   -2.1442   -0.4025    0.0000 C   0  0  0  0  0  0  0  0  0  0  0  0
   -2.8587    0.0100    0.0000 C   0  0  0  0  0  0  0  0  0  0  0  0
   -3.5731   -0.4025    0.0000 N   0  0  0  0  0  0  0  0  0  0  0  0
   -4.2876    0.0100    0.0000 C   0  0  0  0  0  0  0  0  0  0  0  0
    0.7137   -1.2275    0.0000 C   0  0  0  0  0  0  0  0  0  0  0  0
   -2.1442   -1.2275    0.0000 C   0  0  0  0  0  0  0  0  0  0  0  0
   -4.2876    0.8350    0.0000 C   0  0  0  0  0  0  0  0  0  0  0  0
   -5.0021    1.2475    0.0000 C   0  0  0  0  0  0  0  0  0  0  0  0
   -5.7165    0.8350    0.0000 C   0  0  0  0  0  0  0  0  0  0  0  0
   -5.7165    0.0100    0.0000 C   0  0  0  0  0  0  0  0  0  0  0  0
   -5.0021   -0.4025    0.0000 C   0  0  0  0  0  0  0  0  0  0  0  0
   -5.0021   -1.2275    0.0000 Cl  0  0  0  0  0  0  0  0  0  0  0  0
    3.5704   -0.4131    0.0000 P   0  0  0  0  0  0  0  0  0  0  0  0
    4.2876   -0.0053    0.0000 O   0  0  0  0  0  0  0  0  0  0  0  0
    4.9994   -0.4225    0.0000 P   0  0  0  0  0  0  0  0  0  0  0  0
    3.5650   -1.2380    0.0000 O   0  0  0  0  0  0  0  0  0  0  0  0
    5.7165   -0.0147    0.0000 O   0  5  0  0  0  0  0  0  0  0  0  0
    4.9939   -1.2475    0.0000 O   0  0  0  0  0  0  0  0  0  0  0  0
    3.5704    0.4119    0.0000 O   0  5  0  0  0  0  0  0  0  0  0  0
    4.9994    0.4025    0.0000 O   0  5  0  0  0  0  0  0  0  0  0  0
  1  2  1  0      
  1  3  1  0      
  3  4  2  0      
  4  5  1  0      
  5  6  1  0      
  6  7  1  0      
  7  8  2  0      
  8  9  1  0      
  9 10  1  0      
 10 11  1  0      
  4 12  1  0      
  8 13  1  0      
 11 14  2  0      
 14 15  1  0      
 15 16  2  0      
 16 17  1  0      
 17 18  2  0      
 18 11  1  0      
 18 19  1  0      
 20 21  1  0      
 21 22  1  0      
 20 23  2  0      
 22 24  1  0      
 22 25  2  0      
 20 26  1  0      
 22 27  1  0      
  2 20  1  0      
M  CHG  3  24  -1  26  -1  27  -1
M  END
