# Supplementary material for: Structure and specificity of a permissive bacterial C-prenyltransferase
Source: Springer Nature journal article supplement (doi:10.1038/nchembio.2285), 2017-02-06
Supplement: 41589_2017_BFnchembio2285_MOESM102_ESM.mol [file 41589_2017_BFnchembio2285_MOESM102_ESM.mol]

nchembio.2285-comp48.mol
  ChemDraw01041716032D

 30 30  0  0  0  0  0  0  0  0999 V2000
    2.8500   -0.4125    0.0000 C   0  0  0  0  0  0  0  0  0  0  0  0
    3.5645    0.0000    0.0000 O   0  0  0  0  0  0  0  0  0  0  0  0
    2.1355    0.0000    0.0000 C   0  0  0  0  0  0  0  0  0  0  0  0
    1.4211   -0.4125    0.0000 C   0  0  0  0  0  0  0  0  0  0  0  0
    0.7066    0.0000    0.0000 C   0  0  0  0  0  0  0  0  0  0  0  0
   -0.0079   -0.4125    0.0000 C   0  0  0  0  0  0  0  0  0  0  0  0
   -0.7223    0.0000    0.0000 C   0  0  0  0  0  0  0  0  0  0  0  0
   -1.4368   -0.4125    0.0000 C   0  0  0  0  0  0  0  0  0  0  0  0
   -2.1513    0.0000    0.0000 C   0  0  0  0  0  0  0  0  0  0  0  0
   -2.8658   -0.4125    0.0000 N   0  0  0  0  0  0  0  0  0  0  0  0
   -3.5802    0.0000    0.0000 C   0  0  0  0  0  0  0  0  0  0  0  0
    1.4211   -1.2375    0.0000 C   0  0  0  0  0  0  0  0  0  0  0  0
   -1.4368   -1.2375    0.0000 C   0  0  0  0  0  0  0  0  0  0  0  0
   -3.5802    0.8250    0.0000 C   0  0  0  0  0  0  0  0  0  0  0  0
   -4.2947    1.2375    0.0000 C   0  0  0  0  0  0  0  0  0  0  0  0
   -5.0092    0.8250    0.0000 C   0  0  0  0  0  0  0  0  0  0  0  0
   -5.0092    0.0000    0.0000 C   0  0  0  0  0  0  0  0  0  0  0  0
   -4.2947   -0.4125    0.0000 C   0  0  0  0  0  0  0  0  0  0  0  0
    4.2896   -0.3879    0.0000 P   0  0  0  0  0  0  0  0  0  0  0  0
    5.0068    0.0199    0.0000 O   0  0  0  0  0  0  0  0  0  0  0  0
    5.7185   -0.3973    0.0000 P   0  0  0  0  0  0  0  0  0  0  0  0
    4.2842   -1.2128    0.0000 O   0  0  0  0  0  0  0  0  0  0  0  0
    6.4357    0.0105    0.0000 O   0  5  0  0  0  0  0  0  0  0  0  0
    5.7131   -1.2223    0.0000 O   0  0  0  0  0  0  0  0  0  0  0  0
    4.2896    0.4371    0.0000 O   0  5  0  0  0  0  0  0  0  0  0  0
    5.7185    0.4277    0.0000 O   0  5  0  0  0  0  0  0  0  0  0  0
   -5.7236   -0.4125    0.0000 C   0  0  0  0  0  0  0  0  0  0  0  0
   -6.1348    0.2996    0.0000 F   0  0  0  0  0  0  0  0  0  0  0  0
   -6.4357   -0.8236    0.0000 F   0  0  0  0  0  0  0  0  0  0  0  0
   -5.3125   -1.1246    0.0000 F   0  0  0  0  0  0  0  0  0  0  0  0
 27 28  1  0      
 27 29  1  0      
 27 30  1  0      
 17 27  1  0      
  1  2  1  0      
  1  3  1  0      
  3  4  2  0      
  4  5  1  0      
  5  6  1  0      
  6  7  1  0      
  7  8  2  0      
  8  9  1  0      
  9 10  1  0      
 10 11  1  0      
  4 12  1  0      
  8 13  1  0      
 11 14  2  0      
 14 15  1  0      
 15 16  2  0      
 16 17  1  0      
 17 18  2  0      
 18 11  1  0      
 19 20  1  0      
 20 21  1  0      
 19 22  2  0      
 21 23  1  0      
 21 24  2  0      
 19 25  1  0      
 21 26  1  0      
  2 19  1  0      
M  CHG  3  23  -1  25  -1  26  -1
M  STY  1   1 SUP
M  SLB  1   1   1
M  SAL   1  4  27  28  29  30
M  SBL   1  1   4
M  SMT   1 ^CF3
M  SBV   1   4    0.7145    0.4125
M  END
